# Supplementary material for: Immune Cell Networks Uncover Candidate Biomarkers of Melanoma Immunotherapy Response
Source: J Pers Med. 2022 Jun 11;12(6):958. doi: 10.3390/jpm12060958 (PMC9225330; doi:10.3390/jpm12060958)
Supplement: Supplementary file 1 [file jpm-12-00958-s001.zip › SupplementaryTables_S1_S2.xlsx]

## Sheet: Table S1
Table S1. Functional Annotation Clustering result for MEL_NAI
Annotation Cluster 1	Enrichment Score: 2.9955186461335774
Category	Term	Count	%	PValue	Genes	List Total	Pop Hits	Pop Total	Fold Enrichment	Bonferroni	Benjamini	FDR
GOTERM_BP_DIRECT	GO:0007062~sister chromatid cohesion	9	8.57143	9.46338e-08	4928, 57405, 25909, 2491, 3619, 699, 81930, 5347, 1063	101	33	5431	14.6652	8.28958e-05	8.28958e-05	0.000146995
GOTERM_CC_DIRECT	GO:0000776~kinetochore	8	7.61905	8.01635e-07	4928, 2491, 3619, 699, 81930, 5347, 4751, 1063	101	31	5667	14.4797	0.000174741	0.000174741	0.00101893
UP_KEYWORDS	Kinetochore	7	6.66667	1.22585e-05	57405, 25909, 3619, 699, 5347, 4751, 1063	104	31	5932	12.8797	0.00233864	0.00233864	0.0152478
UP_KEYWORDS	Centromere	8	7.61905	1.37878e-05	57405, 25909, 2491, 3619, 699, 5347, 4751, 1063	104	47	5932	9.70867	0.00263002	0.00131588	0.0171499
GOTERM_BP_DIRECT	GO:0000910~cytokinesis	6	5.71429	3.08268e-05	25909, 3619, 598, 5347, 55909, 54902	101	21	5431	15.3635	0.0266433	0.0134116	0.0478725
UP_KEYWORDS	Cell division	10	9.52381	0.000327274	57405, 25909, 3619, 699, 54892, 5347, 4751, 1063, 55909, 54902	104	127	5932	4.49122	0.0606053	0.0206242	0.406349
UP_KEYWORDS	Chromosome	10	9.52381	0.000367719	57405, 25909, 2491, 3619, 699, 5347, 4751, 1063, 10061, 51514	104	129	5932	4.42159	0.0678367	0.0174085	0.45646
GOTERM_CC_DIRECT	GO:0000777~condensed chromosome kinetochore	5	4.7619	0.00086854	57405, 25909, 3619, 699, 4751	101	25	5667	11.2218	0.172564	0.0611892	1.09838
GOTERM_CC_DIRECT	GO:0030496~midbody	6	5.71429	0.000973839	3619, 5347, 4751, 1063, 9928, 54902	101	44	5667	7.65122	0.191359	0.0517149	1.23078
GOTERM_BP_DIRECT	GO:0007067~mitotic nuclear division	7	6.66667	0.00357051	57405, 3619, 699, 54892, 5347, 4751, 1063	101	81	5431	4.64699	0.956429	0.648117	5.40448
UP_KEYWORDS	Mitosis	7	6.66667	0.00383948	57405, 3619, 699, 54892, 5347, 4751, 1063	104	87	5932	4.5893	0.520375	0.115257	4.67259
UP_KEYWORDS	Cell cycle	11	10.4762	0.00525286	57405, 25909, 3619, 699, 54892, 5347, 4751, 1063, 55909, 7159, 54902	104	224	5932	2.801	0.634299	0.133857	6.34147
GOTERM_BP_DIRECT	GO:0007059~chromosome segregation	4	3.80952	0.00633188	57405, 3619, 4751, 1063	101	21	5431	10.2423	0.996168	0.751196	9.39546
GOTERM_BP_DIRECT	GO:0007094~mitotic spindle assembly checkpoint	3	2.85714	0.00874331	699, 5347, 1063	101	8	5431	20.1646	0.999544	0.666787	12.7513
UP_KEYWORDS	Chromosome partition	3	2.85714	0.0421401	3619, 699, 4751	104	19	5932	9.00607	0.999732	0.444216	41.4661
GOTERM_BP_DIRECT	GO:0051301~cell division	6	5.71429	0.0600864	57405, 699, 54892, 4751, 1063, 9928	101	115	5431	2.80551	1	0.973188	61.8078
GOTERM_CC_DIRECT	GO:0000922~spindle pole	3	2.85714	0.114469	5347, 4751, 1063	101	33	5667	5.10081	1	0.84938	78.6734
GOTERM_CC_DIRECT	GO:0000785~chromatin	3	2.85714	0.126165	25909, 5347, 1063	101	35	5667	4.80934	1	0.859145	81.9895
GOTERM_CC_DIRECT	GO:0005819~spindle	3	2.85714	0.207419	3619, 5347, 1063	101	48	5667	3.50681	1	0.920645	94.7908
Annotation Cluster 2	Enrichment Score: 2.20129551598811
Category	Term	Count	%	PValue	Genes	List Total	Pop Hits	Pop Total	Fold Enrichment	Bonferroni	Benjamini	FDR
GOTERM_CC_DIRECT	GO:0030496~midbody	6	5.71429	0.000973839	3619, 5347, 4751, 1063, 9928, 54902	101	44	5667	7.65122	0.191359	0.0517149	1.23078
UP_KEYWORDS	Cytoskeleton	15	14.2857	0.012931	3619, 598, 81930, 1861, 1063, 9928, 54902, 10391, 4751, 5347, 51512, 55909, 56912, 10142, 51514	104	419	5932	2.04195	0.916752	0.220103	14.9477
GOTERM_CC_DIRECT	GO:0005813~centrosome	8	7.61905	0.0197694	598, 5347, 4751, 1063, 56912, 10142, 51514, 54902	101	156	5667	2.87738	0.987131	0.463046	22.4153
Annotation Cluster 3	Enrichment Score: 1.5080800222419053
Category	Term	Count	%	PValue	Genes	List Total	Pop Hits	Pop Total	Fold Enrichment	Bonferroni	Benjamini	FDR
GOTERM_CC_DIRECT	GO:0030496~midbody	6	5.71429	0.000973839	3619, 5347, 4751, 1063, 9928, 54902	101	44	5667	7.65122	0.191359	0.0517149	1.23078
UP_KEYWORDS	Microtubule	5	4.7619	0.092683	3619, 81930, 4751, 51512, 9928	104	99	5932	2.88073	1	0.604998	70.1773
GOTERM_CC_DIRECT	GO:0005874~microtubule	4	3.80952	0.331339	3619, 81930, 4751, 9928	101	115	5667	1.95161	1	0.965769	99.3999
Annotation Cluster 4	Enrichment Score: 1.1685257729705614
Category	Term	Count	%	PValue	Genes	List Total	Pop Hits	Pop Total	Fold Enrichment	Bonferroni	Benjamini	FDR
GOTERM_BP_DIRECT	GO:0006661~phosphatidylinositol biosynthetic process	3	2.85714	0.0561756	4534, 51763, 8394	101	21	5431	7.68175	1	0.973152	59.2634
KEGG_PATHWAY	hsa00562:Inositol phosphate metabolism	3	2.85714	0.0579208	4534, 51763, 8394	40	24	2372	7.4125	0.99935	0.99935	49.7412
KEGG_PATHWAY	hsa04070:Phosphatidylinositol signaling system	3	2.85714	0.0959489	4534, 51763, 8394	40	32	2372	5.55938	0.999996	0.955029	68.748
Annotation Cluster 5	Enrichment Score: 1.161496853143456
Category	Term	Count	%	PValue	Genes	List Total	Pop Hits	Pop Total	Fold Enrichment	Bonferroni	Benjamini	FDR
UP_KEYWORDS	Protein transport	10	9.52381	0.0106636	79735, 4928, 23534, 25909, 4534, 375035, 81930, 53407, 83452, 9609	104	211	5932	2.70324	0.870967	0.225828	12.4851
GOTERM_BP_DIRECT	GO:0015031~protein transport	7	6.66667	0.0669317	79735, 25909, 4534, 375035, 81930, 9609, 1063	101	156	5431	2.41286	1	0.971838	65.907
UP_KEYWORDS	Transport	13	12.381	0.459169	23534, 79735, 19, 375035, 81930, 83452, 4928, 25909, 4534, 65110, 53407, 9609, 55652	104	651	5932	1.13902	1	0.934793	99.9522
Annotation Cluster 6	Enrichment Score: 0.9379630557740714
Category	Term	Count	%	PValue	Genes	List Total	Pop Hits	Pop Total	Fold Enrichment	Bonferroni	Benjamini	FDR
UP_KEYWORDS	Golgi apparatus	10	9.52381	0.0637958	79158, 50861, 53407, 83452, 9609, 8703, 857, 9917, 10142, 999	104	290	5932	1.96684	0.999997	0.568031	55.958
GOTERM_CC_DIRECT	GO:0005794~Golgi apparatus	10	9.52381	0.138938	79158, 5894, 50861, 19, 83452, 9609, 8703, 8295, 9917, 10142	101	337	5667	1.66495	1	0.86973	85.0637
GOTERM_CC_DIRECT	GO:0000139~Golgi membrane	7	6.66667	0.17318	79158, 53407, 83452, 9609, 8703, 857, 9917	101	213	5667	1.84395	1	0.912719	91.0826
Annotation Cluster 7	Enrichment Score: 0.8707737742453563
Category	Term	Count	%	PValue	Genes	List Total	Pop Hits	Pop Total	Fold Enrichment	Bonferroni	Benjamini	FDR
GOTERM_BP_DIRECT	GO:0000209~protein polyubiquitination	4	3.80952	0.0905039	26001, 23198, 8454, 51514	101	58	5431	3.70843	1	0.987396	77.0885
GOTERM_MF_DIRECT	GO:0004842~ubiquitin-protein transferase activity	5	4.7619	0.161483	26001, 54880, 8454, 9616, 51514	98	119	5448	2.33579	1	0.967535	89.8963
UP_KEYWORDS	Ubl conjugation pathway	7	6.66667	0.167064	26001, 8454, 9100, 9616, 10401, 57602, 51514	104	214	5932	1.86574	1	0.766547	89.7091
Annotation Cluster 8	Enrichment Score: 0.8461605092425784
Category	Term	Count	%	PValue	Genes	List Total	Pop Hits	Pop Total	Fold Enrichment	Bonferroni	Benjamini	FDR
UP_KEYWORDS	Nucleotide-binding	17	16.1905	0.0757743	55157, 9319, 5894, 699, 19, 81930, 83452, 159, 1861, 3611, 9917, 8394, 9928, 4751, 5347, 9609, 10061	104	630	5932	1.53913	1	0.609631	62.4769
UP_KEYWORDS	ATP-binding	14	13.3333	0.0835284	55157, 9319, 699, 5894, 19, 81930, 1861, 3611, 9917, 8394, 9928, 4751, 5347, 10061	104	493	5932	1.61975	1	0.624685	66.2105
GOTERM_MF_DIRECT	GO:0005524~ATP binding	14	13.3333	0.142244	55157, 9319, 699, 5894, 19, 81930, 1861, 3611, 9917, 8394, 9928, 4751, 5347, 10061	98	528	5448	1.47403	1	0.960637	86.426
UP_KEYWORDS	Kinase	8	7.61905	0.212419	5894, 699, 5347, 4751, 3611, 9917, 10142, 8394	104	280	5932	1.62967	1	0.826951	94.8717
UP_SEQ_FEATURE	nucleotide phosphate-binding region:ATP	9	8.57143	0.307337	9319, 5894, 699, 81930, 5347, 4751, 1861, 3611, 9928	104	366	5900	1.39502	1	1	99.3956
Annotation Cluster 9	Enrichment Score: 0.7696083743705966
Category	Term	Count	%	PValue	Genes	List Total	Pop Hits	Pop Total	Fold Enrichment	Bonferroni	Benjamini	FDR
UP_KEYWORDS	Prenylation	4	3.80952	0.113773	83452, 9609, 1063, 2786	104	68	5932	3.3552	1	0.649575	77.7418
UP_SEQ_FEATURE	lipid moiety-binding region:S-geranylgeranyl cysteine	3	2.85714	0.147801	83452, 9609, 2786	104	39	5900	4.36391	1	1	89.1939
UP_KEYWORDS	Lipoprotein	8	7.61905	0.292051	54927, 50861, 19, 83452, 9609, 1063, 857, 2786	104	310	5932	1.47196	1	0.872737	98.6382
Annotation Cluster 10	Enrichment Score: 0.6260410391835741
Category	Term	Count	%	PValue	Genes	List Total	Pop Hits	Pop Total	Fold Enrichment	Bonferroni	Benjamini	FDR
GOTERM_MF_DIRECT	GO:0008134~transcription factor binding	5	4.7619	0.138253	54880, 4204, 23028, 1063, 51141	98	112	5448	2.48178	1	0.967361	85.5805
GOTERM_BP_DIRECT	GO:0045892~negative regulation of transcription, DNA-templated	7	6.66667	0.192133	54880, 4204, 51763, 23028, 1063, 26585, 55635	101	211	5431	1.78391	1	0.998738	96.3633
GOTERM_MF_DIRECT	GO:0003682~chromatin binding	4	3.80952	0.498426	4204, 23028, 661, 1063	98	149	5448	1.4924	1	0.999307	99.9874
Annotation Cluster 11	Enrichment Score: 0.6074119666345359
Category	Term	Count	%	PValue	Genes	List Total	Pop Hits	Pop Total	Fold Enrichment	Bonferroni	Benjamini	FDR
GOTERM_MF_DIRECT	GO:0016491~oxidoreductase activity	4	3.80952	0.128064	25979, 8644, 23028, 79758	98	70	5448	3.17668	1	0.968793	83.197
UP_SEQ_FEATURE	binding site:Substrate	4	3.80952	0.184995	25979, 6303, 8644, 79758	104	85	5900	2.66968	1	1	94.1918
UP_KEYWORDS	NAD	3	2.85714	0.292721	25979, 8644, 79758	104	62	5932	2.75993	1	0.865274	98.6541
UP_KEYWORDS	Oxidoreductase	6	5.71429	0.30051	25979, 8644, 23028, 79758, 55239, 593	104	210	5932	1.62967	1	0.865712	98.8273
GOTERM_BP_DIRECT	GO:0055114~oxidation-reduction process	6	5.71429	0.322194	25979, 8644, 23028, 79758, 55239, 593	101	204	5431	1.58154	1	0.9999	99.762
UP_KEYWORDS	NADP	3	2.85714	0.337684	25979, 8644, 79758	104	69	5932	2.47993	1	0.880791	99.4055
Annotation Cluster 12	Enrichment Score: 0.596079493680948
Category	Term	Count	%	PValue	Genes	List Total	Pop Hits	Pop Total	Fold Enrichment	Bonferroni	Benjamini	FDR
GOTERM_BP_DIRECT	GO:0008283~cell proliferation	9	8.57143	0.00686735	8454, 5894, 598, 699, 5347, 23028, 55239, 1063, 3611	101	153	5431	3.16308	0.99761	0.634355	10.1509
GOTERM_MF_DIRECT	GO:0016301~kinase activity	6	5.71429	0.0359199	5894, 699, 5347, 8295, 9917, 10142	98	103	5448	3.23836	0.999904	0.954269	37.8806
KEGG_PATHWAY	hsa04914:Progesterone-mediated oocyte maturation	3	2.85714	0.106348	5894, 699, 5347	40	34	2372	5.23235	0.999999	0.937087	72.6511
UP_KEYWORDS	Kinase	8	7.61905	0.212419	5894, 699, 5347, 4751, 3611, 9917, 10142, 8394	104	280	5932	1.62967	1	0.826951	94.8717
GOTERM_MF_DIRECT	GO:0004674~protein serine/threonine kinase activity	5	4.7619	0.285707	5894, 699, 5347, 4751, 3611	98	152	5448	1.82868	1	0.996569	98.7464
UP_SEQ_FEATURE	nucleotide phosphate-binding region:ATP	9	8.57143	0.307337	9319, 5894, 699, 81930, 5347, 4751, 1861, 3611, 9928	104	366	5900	1.39502	1	1	99.3956
GOTERM_MF_DIRECT	GO:0004672~protein kinase activity	5	4.7619	0.309908	5894, 699, 5347, 4751, 3611	98	158	5448	1.75924	1	0.997164	99.1996
UP_KEYWORDS	Serine/threonine-protein kinase	5	4.7619	0.317811	5894, 699, 5347, 4751, 3611	104	164	5932	1.73898	1	0.875951	99.1412
INTERPRO	IPR011009:Protein kinase-like domain	6	5.71429	0.332843	5894, 699, 5347, 4751, 3611, 8295	104	210	5678	1.55989	1	1	99.5054
UP_KEYWORDS	Transferase	13	12.381	0.35568	79158, 5894, 699, 6303, 5347, 4751, 84172, 8703, 3611, 9917, 10142, 8394, 23333	104	604	5932	1.22765	1	0.883832	99.578
SMART	SM00220:S_TKc	4	3.80952	0.382387	5894, 699, 5347, 4751	51	150	3389	1.77203	1	0.999935	99.2008
INTERPRO	IPR008271:Serine/threonine-protein kinase, active site	4	3.80952	0.426109	5894, 699, 5347, 4751	104	131	5678	1.66706	1	1	99.9314
UP_SEQ_FEATURE	domain:Protein kinase	5	4.7619	0.436924	5894, 699, 5347, 4751, 3611	104	193	5900	1.46971	1	1	99.9661
GOTERM_BP_DIRECT	GO:0006468~protein phosphorylation	5	4.7619	0.465887	5894, 699, 5347, 4751, 3611	101	190	5431	1.41506	1	0.999998	99.9941
INTERPRO	IPR000719:Protein kinase, catalytic domain	5	4.7619	0.490329	5894, 699, 5347, 4751, 3611	104	199	5678	1.37176	1	1	99.9855
UP_SEQ_FEATURE	active site:Proton acceptor	6	5.71429	0.495352	25979, 5894, 699, 5347, 4751, 79758	104	265	5900	1.28447	1	1	99.9926
UP_SEQ_FEATURE	binding site:ATP	5	4.7619	0.517443	5894, 699, 5347, 4751, 3611	104	214	5900	1.32549	1	1	99.996
INTERPRO	IPR017441:Protein kinase, ATP binding site	3	2.85714	0.783992	5894, 699, 5347	104	157	5678	1.04324	1	1	100
Annotation Cluster 13	Enrichment Score: 0.5304100475728021
Category	Term	Count	%	PValue	Genes	List Total	Pop Hits	Pop Total	Fold Enrichment	Bonferroni	Benjamini	FDR
SMART	SM00248:ANK	3	2.85714	0.22683	54880, 3611, 7159	51	61	3389	3.26808	1	0.999555	92.4084
UP_SEQ_FEATURE	repeat:ANK 2	3	2.85714	0.288396	54880, 3611, 7159	104	61	5900	2.79004	1	1	99.1204
UP_SEQ_FEATURE	repeat:ANK 1	3	2.85714	0.288396	54880, 3611, 7159	104	61	5900	2.79004	1	1	99.1204
UP_KEYWORDS	ANK repeat	3	2.85714	0.318491	54880, 3611, 7159	104	66	5932	2.59266	1	0.869241	99.1518
INTERPRO	IPR002110:Ankyrin repeat	3	2.85714	0.324048	54880, 3611, 7159	104	64	5678	2.55919	1	1	99.4127
INTERPRO	IPR020683:Ankyrin repeat-containing domain	3	2.85714	0.337407	54880, 3611, 7159	104	66	5678	2.48164	1	1	99.548
Annotation Cluster 14	Enrichment Score: 0.43833634470674243
Category	Term	Count	%	PValue	Genes	List Total	Pop Hits	Pop Total	Fold Enrichment	Bonferroni	Benjamini	FDR
GOTERM_BP_DIRECT	GO:0008380~RNA splicing	3	2.85714	0.296392	6627, 10284, 23450	101	59	5431	2.73418	1	0.999883	99.5748
UP_KEYWORDS	mRNA processing	4	3.80952	0.346311	6627, 1478, 10284, 23450	104	120	5932	1.90128	1	0.881969	99.495
UP_KEYWORDS	mRNA splicing	3	2.85714	0.471691	6627, 10284, 23450	104	91	5932	1.88039	1	0.937327	99.9643
Annotation Cluster 15	Enrichment Score: 0.43571717405717164
Category	Term	Count	%	PValue	Genes	List Total	Pop Hits	Pop Total	Fold Enrichment	Bonferroni	Benjamini	FDR
UP_KEYWORDS	Mitochondrion inner membrane	3	2.85714	0.240961	54927, 598, 54902	104	54	5932	3.1688	1	0.827145	96.7599
UP_KEYWORDS	Mitochondrion	7	6.66667	0.431255	55157, 54927, 79693, 5894, 598, 593, 54902	104	303	5932	1.31772	1	0.923183	99.9106
GOTERM_CC_DIRECT	GO:0005743~mitochondrial inner membrane	3	2.85714	0.474425	54927, 598, 54902	101	90	5667	1.8703	1	0.987502	99.9719
Annotation Cluster 16	Enrichment Score: 0.40469830112509336
Category	Term	Count	%	PValue	Genes	List Total	Pop Hits	Pop Total	Fold Enrichment	Bonferroni	Benjamini	FDR
GOTERM_CC_DIRECT	GO:0005739~mitochondrion	10	9.52381	0.316819	55157, 54927, 54880, 79693, 4204, 598, 7159, 10061, 593, 54902	101	418	5667	1.34232	1	0.96393	99.2114
UP_SEQ_FEATURE	transit peptide:Mitochondrion	4	3.80952	0.359032	55157, 54927, 79693, 593	104	122	5900	1.86003	1	1	99.7946
UP_KEYWORDS	Mitochondrion	7	6.66667	0.431255	55157, 54927, 79693, 5894, 598, 593, 54902	104	303	5932	1.31772	1	0.923183	99.9106
UP_KEYWORDS	Transit peptide	4	3.80952	0.490374	55157, 79693, 593, 54902	104	151	5932	1.51095	1	0.942794	99.9772
Annotation Cluster 17	Enrichment Score: 0.38088695804626066
Category	Term	Count	%	PValue	Genes	List Total	Pop Hits	Pop Total	Fold Enrichment	Bonferroni	Benjamini	FDR
UP_KEYWORDS	Repressor	8	7.61905	0.0854449	54927, 54880, 4204, 51385, 23028, 10284, 2117, 55635	104	219	5932	2.0836	1	0.612391	67.079
GOTERM_BP_DIRECT	GO:0006351~transcription, DNA-templated	12	11.4286	0.620058	687, 54927, 54880, 4204, 10401, 84172, 23028, 10284, 8295, 10481, 2117, 55635	101	629	5431	1.02586	1	1	100
UP_KEYWORDS	Transcription	14	13.3333	0.682427	687, 54880, 4204, 10401, 661, 10284, 10481, 7392, 54927, 84172, 23028, 8295, 2117, 55635	104	820	5932	0.973827	1	0.981377	99.9999
UP_KEYWORDS	Transcription regulation	12	11.4286	0.828471	7392, 687, 54927, 54880, 4204, 10401, 23028, 10284, 8295, 10481, 2117, 55635	104	792	5932	0.864219	1	0.995228	100
Annotation Cluster 18	Enrichment Score: 0.3446960579265377
Category	Term	Count	%	PValue	Genes	List Total	Pop Hits	Pop Total	Fold Enrichment	Bonferroni	Benjamini	FDR
KEGG_PATHWAY	hsa05200:Pathways in cancer	5	4.7619	0.377783	5894, 598, 3912, 2786, 999	40	189	2372	1.56878	1	0.984525	99.5793
KEGG_PATHWAY	hsa04151:PI3K-Akt signaling pathway	4	3.80952	0.478669	5894, 598, 3912, 2786	40	156	2372	1.52051	1	0.993312	99.9453
KEGG_PATHWAY	hsa04014:Ras signaling pathway	3	2.85714	0.51125	5894, 598, 2786	40	103	2372	1.72718	1	0.994371	99.974
Annotation Cluster 19	Enrichment Score: 0.2925466300708202
Category	Term	Count	%	PValue	Genes	List Total	Pop Hits	Pop Total	Fold Enrichment	Bonferroni	Benjamini	FDR
GOTERM_CC_DIRECT	GO:0030054~cell junction	5	4.7619	0.356693	598, 9456, 1861, 3611, 999	101	171	5667	1.64061	1	0.96776	99.6328
UP_KEYWORDS	Cell junction	6	5.71429	0.530271	598, 9456, 1861, 3611, 58497, 999	104	277	5932	1.23549	1	0.953608	99.9917
UP_KEYWORDS	Synapse	3	2.85714	0.700757	598, 9456, 1861	104	139	5932	1.23105	1	0.983674	100
Annotation Cluster 20	Enrichment Score: 0.25633139008517236
Category	Term	Count	%	PValue	Genes	List Total	Pop Hits	Pop Total	Fold Enrichment	Bonferroni	Benjamini	FDR
GOTERM_MF_DIRECT	GO:0003723~RNA binding	5	4.7619	0.367012	4928, 1478, 65110, 55323, 23450	98	172	5448	1.61604	1	0.998893	99.7399
INTERPRO	IPR012677:Nucleotide-binding, alpha-beta plait	3	2.85714	0.506424	1478, 65110, 55323	104	93	5678	1.76117	1	1	99.9905
GOTERM_MF_DIRECT	GO:0000166~nucleotide binding	3	2.85714	0.653305	1478, 65110, 55323	98	124	5448	1.34496	1	0.999978	99.9999
UP_KEYWORDS	RNA-binding	4	3.80952	0.776897	6627, 1478, 65110, 55323	104	233	5932	0.979201	1	0.991565	100
Annotation Cluster 21	Enrichment Score: 0.20350061828213895
Category	Term	Count	%	PValue	Genes	List Total	Pop Hits	Pop Total	Fold Enrichment	Bonferroni	Benjamini	FDR
UP_SEQ_FEATURE	nucleotide phosphate-binding region:GTP	3	2.85714	0.556418	83452, 9609, 159	104	106	5900	1.60559	1	1	99.9988
UP_KEYWORDS	GTP-binding	3	2.85714	0.63051	83452, 9609, 159	104	122	5932	1.40259	1	0.972347	99.9996
GOTERM_MF_DIRECT	GO:0005525~GTP binding	3	2.85714	0.698884	83452, 9609, 159	98	135	5448	1.23537	1	0.999992	100
Annotation Cluster 22	Enrichment Score: 0.060478333220383526
Category	Term	Count	%	PValue	Genes	List Total	Pop Hits	Pop Total	Fold Enrichment	Bonferroni	Benjamini	FDR
UP_KEYWORDS	Metal-binding	19	18.0952	0.823036	687, 5894, 9616, 54680, 10401, 51385, 55239, 159, 9917, 26001, 79158, 8828, 4751, 8703, 84172, 9508, 58497, 999, 593	104	1226	5932	0.883957	1	0.995181	100
UP_KEYWORDS	Zinc-finger	8	7.61905	0.834773	687, 26001, 5894, 54680, 9616, 10401, 84172, 51385	104	536	5932	0.85132	1	0.995361	100
UP_KEYWORDS	Zinc	9	8.57143	0.958468	687, 26001, 5894, 54680, 9616, 10401, 84172, 51385, 9508	104	750	5932	0.684462	1	0.99983	100
Annotation Cluster 23	Enrichment Score: 0.025717542944753688
Category	Term	Count	%	PValue	Genes	List Total	Pop Hits	Pop Total	Fold Enrichment	Bonferroni	Benjamini	FDR
UP_KEYWORDS	Membrane	37	35.2381	0.804467	10244, 9456, 5894, 19, 1861, 5376, 2786, 4928, 4534, 53407, 27013, 55831, 51514, 25979, 598, 375035, 51704, 83452, 857, 3611, 9917, 8394, 54902, 26001, 79158, 54927, 79693, 51622, 54946, 8828, 9609, 8703, 55652, 6382, 23333, 51141, 999	104	2287	5932	0.922791	1	0.993965	100
UP_SEQ_FEATURE	transmembrane region	20	19.0476	0.953186	25979, 598, 375035, 19, 51704, 857, 5376, 26001, 79158, 8828, 54946, 53407, 8703, 55652, 6382, 27013, 23333, 55831, 999, 51141	104	1468	5900	0.772899	1	1	100
UP_KEYWORDS	Transmembrane helix	22	20.9524	0.968477	25979, 598, 375035, 19, 51704, 857, 9917, 5376, 26001, 79158, 54927, 8828, 54946, 53407, 8703, 55652, 6382, 27013, 23333, 55831, 999, 51141	104	1652	5932	0.759592	1	0.999896	100
UP_KEYWORDS	Transmembrane	22	20.9524	0.969775	25979, 598, 375035, 19, 51704, 857, 9917, 5376, 26001, 79158, 54927, 8828, 54946, 53407, 8703, 55652, 6382, 27013, 23333, 55831, 999, 51141	104	1657	5932	0.7573	1	0.999894	100
GOTERM_CC_DIRECT	GO:0016021~integral component of membrane	19	18.0952	0.974121	25979, 598, 375035, 51704, 857, 9917, 5376, 26001, 79158, 8828, 54946, 53407, 8703, 55652, 27013, 23333, 55831, 999, 51141	101	1455	5667	0.732694	1	1	100
UP_SEQ_FEATURE	topological domain:Cytoplasmic	9	8.57143	0.999161	25979, 8828, 375035, 53407, 51704, 8703, 6382, 857, 999	104	1064	5900	0.479866	1	1	100
Annotation Cluster 24	Enrichment Score: 0.0030820161898708043
Category	Term	Count	%	PValue	Genes	List Total	Pop Hits	Pop Total	Fold Enrichment	Bonferroni	Benjamini	FDR
UP_SEQ_FEATURE	signal peptide	13	12.381	0.987959	51704, 25987, 1861, 9917, 26585, 51108, 26001, 8828, 9508, 6382, 3912, 3073, 999	104	1147	5900	0.642982	1	1	100
UP_KEYWORDS	Glycoprotein	18	17.1429	0.989267	19, 81930, 51704, 25987, 1861, 26585, 9917, 5376, 51108, 26001, 79158, 8828, 8703, 9508, 6382, 3912, 999, 3073	104	1508	5932	0.68083	1	0.999989	100
UP_KEYWORDS	Disulfide bond	12	11.4286	0.991623	79158, 54927, 8828, 5894, 19, 8703, 9508, 3912, 26585, 9917, 999, 3073	104	1115	5932	0.613867	1	0.999993	100
UP_SEQ_FEATURE	glycosylation site:N-linked (GlcNAc...)	16	15.2381	0.992309	19, 51704, 25987, 26585, 9917, 5376, 51108, 26001, 79158, 8828, 8703, 9508, 6382, 3912, 999, 3073	104	1397	5900	0.649744	1	1	100
UP_KEYWORDS	Secreted	6	5.71429	0.992898	8828, 9508, 25987, 6382, 3912, 26585	104	666	5932	0.51386	1	0.999995	100
UP_KEYWORDS	Signal	14	13.3333	0.995474	5894, 51704, 25987, 1861, 26585, 51108, 26001, 8828, 9508, 6382, 3912, 56912, 3073, 999	104	1313	5932	0.608179	1	0.999998	100
UP_SEQ_FEATURE	disulfide bond	9	8.57143	0.996786	79158, 8828, 19, 8703, 9508, 3912, 26585, 999, 3073	104	964	5900	0.529644	1	1	100
GOTERM_CC_DIRECT	GO:0005576~extracellular region	4	3.80952	0.997152	8828, 9508, 3912, 999	101	539	5667	0.416393	1	1	100

## Sheet: Table S2
Table S2. Functional Annotation Clustering result for MEL_PROG
Annotation Cluster 1	Enrichment Score: 3.118460910714781
Category	Term	Count	%	PValue	Genes	List Total	Pop Hits	Pop Total	Fold Enrichment	Bonferroni	Benjamini	FDR
UP_KEYWORDS	Immunity	13	8.55263	0.000172613	4217, 920, 718, 1191, 8631, 81030, 4063, 54900, 925, 4064, 973, 30835, 51279	151	138	5932	3.70074	0.0380965	0.0380965	0.220296
UP_KEYWORDS	Adaptive immunity	7	4.60526	0.000387194	920, 8631, 4063, 54900, 925, 973, 30835	151	39	5932	7.05111	0.0834471	0.0426323	0.49353
GOTERM_BP_DIRECT	GO:0002250~adaptive immune response	6	3.94737	0.0066011	920, 3458, 8631, 54900, 973, 30835	137	48	5431	4.95529	0.996937	0.854779	9.77326
Annotation Cluster 2	Enrichment Score: 2.644942900751949
Category	Term	Count	%	PValue	Genes	List Total	Pop Hits	Pop Total	Fold Enrichment	Bonferroni	Benjamini	FDR
UP_KEYWORDS	Immunity	13	8.55263	0.000172613	4217, 920, 718, 1191, 8631, 81030, 4063, 54900, 925, 4064, 973, 30835, 51279	151	138	5932	3.70074	0.0380965	0.0380965	0.220296
UP_KEYWORDS	Innate immunity	8	5.26316	0.005818	4217, 718, 1191, 81030, 4063, 4064, 30835, 51279	151	86	5932	3.6544	0.730954	0.354432	7.18338
GOTERM_BP_DIRECT	GO:0045087~innate immune response	9	5.92105	0.0115698	4217, 9830, 1191, 3495, 81030, 4063, 4064, 30835, 51279	137	123	5431	2.90066	0.999962	0.76613	16.5321
Annotation Cluster 3	Enrichment Score: 2.081933653081774
Category	Term	Count	%	PValue	Genes	List Total	Pop Hits	Pop Total	Fold Enrichment	Bonferroni	Benjamini	FDR
SMART	SM00077:ITAM	3	1.97368	0.00369476	919, 917, 973	87	4	3389	29.2155	0.31447	0.31447	4.03998
INTERPRO	IPR003110:Phosphorylated immunoreceptor signaling ITAM	3	1.97368	0.00370631	919, 917, 973	145	4	5678	29.369	0.737302	0.737302	4.97187
GOTERM_MF_DIRECT	GO:0004888~transmembrane signaling receptor activity	5	3.28947	0.041464	920, 919, 971, 917, 973	136	53	5448	3.77913	0.999998	0.98688	43.328
Annotation Cluster 4	Enrichment Score: 2.0183483059307585
Category	Term	Count	%	PValue	Genes	List Total	Pop Hits	Pop Total	Fold Enrichment	Bonferroni	Benjamini	FDR
GOTERM_CC_DIRECT	GO:0042101~T cell receptor complex	5	3.28947	0.000108764	920, 8631, 919, 925, 917	143	11	5667	18.0134	0.0182142	0.0182142	0.132477
BIOCARTA	h_ctlPathway:CTL mediated immune response against target cells	4	2.63158	0.000878582	5551, 919, 917, 3683	28	6	719	17.119	0.0637967	0.0637967	0.918239
GOTERM_BP_DIRECT	GO:0050776~regulation of immune response	7	4.60526	0.000907422	10666, 28755, 718, 919, 925, 917, 3683	137	46	5431	6.03253	0.547717	0.547717	1.39983
BIOCARTA	h_tcytotoxicPathway:T Cytotoxic Cell Surface Molecules	4	2.63158	0.00149894	919, 925, 917, 3683	28	7	719	14.6735	0.106407	0.0546995	1.562
BIOCARTA	h_thelperPathway:T Helper Cell Surface Molecules	4	2.63158	0.00149894	920, 919, 917, 3683	28	7	719	14.6735	0.106407	0.0546995	1.562
BIOCARTA	h_no2il12Pathway:NO2-dependent IL 12 Pathway in NK cells	4	2.63158	0.00233816	920, 3458, 919, 917	28	8	719	12.8393	0.161019	0.056843	2.42685
BIOCARTA	h_il17Pathway:IL 17 Signaling Pathway	4	2.63158	0.00476248	920, 919, 925, 917	28	10	719	10.2714	0.300954	0.0856206	4.88674
GOTERM_BP_DIRECT	GO:0050852~T cell receptor signaling pathway	6	3.94737	0.00499994	920, 3458, 28755, 8631, 919, 917	137	45	5431	5.28564	0.987486	0.888134	7.48837
BIOCARTA	h_tcapoptosisPathway:HIV Induced T Cell Apoptosis	3	1.97368	0.00778442	920, 919, 917	28	4	719	19.2589	0.443515	0.110613	7.87441
BIOCARTA	h_tcraPathway:Lck and Fyn tyrosine kinases in initiation of TCR Activation	3	1.97368	0.00778442	920, 919, 917	28	4	719	19.2589	0.443515	0.110613	7.87441
GOTERM_BP_DIRECT	GO:0031295~T cell costimulation	5	3.28947	0.00785188	920, 28755, 919, 917, 8740	137	32	5431	6.19411	0.998982	0.747899	11.5213
KEGG_PATHWAY	hsa04660:T cell receptor signaling pathway	5	3.28947	0.0367263	920, 3458, 919, 925, 917	64	48	2372	3.86068	0.991989	0.799905	35.2831
GOTERM_MF_DIRECT	GO:0004888~transmembrane signaling receptor activity	5	3.28947	0.041464	920, 919, 971, 917, 973	136	53	5448	3.77913	0.999998	0.98688	43.328
BIOCARTA	h_cskPathway:Activation of Csk by cAMP-dependent Protein Kinase Inhibits Signaling through the T Cell Receptor	3	1.97368	0.0415639	920, 919, 917	28	9	719	8.55952	0.958577	0.41178	35.9521
BIOCARTA	h_tob1Pathway:Role of Tob in T-cell activation	3	1.97368	0.0415639	3458, 919, 917	28	9	719	8.55952	0.958577	0.41178	35.9521
BIOCARTA	h_il12Pathway:IL12 and Stat4 Dependent Signaling Pathway in Th1 Development	3	1.97368	0.0710917	3458, 919, 917	28	12	719	6.41964	0.996038	0.546213	53.8817
KEGG_PATHWAY	hsa05142:Chagas disease (American trypanosomiasis)	4	2.63158	0.0986088	3458, 718, 919, 917	64	42	2372	3.52976	0.999998	0.892691	70.1004
GOTERM_BP_DIRECT	GO:0007166~cell surface receptor signaling pathway	6	3.94737	0.190088	920, 3458, 919, 10149, 925, 917	137	122	5431	1.94962	1	0.9999	96.2139
KEGG_PATHWAY	hsa04640:Hematopoietic cell lineage	3	1.97368	0.247667	920, 925, 917	64	36	2372	3.08854	1	0.953074	96.3464
Annotation Cluster 5	Enrichment Score: 1.4880761900270116
Category	Term	Count	%	PValue	Genes	List Total	Pop Hits	Pop Total	Fold Enrichment	Bonferroni	Benjamini	FDR
BBID	124.GH-IGF1_thymopoiesis	3	1.97368	0.014048	920, 28755, 925	9	4	151	12.5833	0.432155	0.246445	12.141
BBID	81.Structure_of_Caps_and_SMACs	3	1.97368	0.0332529	920, 28755, 925	9	6	151	8.38889	0.741467	0.362952	26.6116
BBID	67.Ikaros_and_signaling_inhibitors	3	1.97368	0.0735066	920, 28755, 925	9	9	151	5.59259	0.952827	0.457077	50.2676
Annotation Cluster 6	Enrichment Score: 1.336467598415467
Category	Term	Count	%	PValue	Genes	List Total	Pop Hits	Pop Total	Fold Enrichment	Bonferroni	Benjamini	FDR
GOTERM_CC_DIRECT	GO:0016021~integral component of membrane	51	33.5526	0.00675912	10067, 5916, 27334, 28978, 3683, 8740, 50615, 28972, 9394, 10162, 6546, 3290, 64748, 10863, 80830, 971, 973, 2327, 79850, 5551, 10666, 4121, 3495, 11230, 10149, 5786, 920, 28755, 10267, 925, 64754, 81790, 90865, 919, 80023, 6581, 51293, 64285, 80008, 955, 5243, 51309, 54900, 917, 29058, 55630, 9037, 29097, 4063, 2135, 30835	143	1455	5667	1.38907	0.682148	0.317544	7.93338
UP_SEQ_FEATURE	transmembrane region	50	32.8947	0.016022	10067, 27334, 28978, 3683, 8740, 50615, 28972, 9394, 10162, 6546, 3290, 64748, 10863, 971, 973, 79850, 5551, 10666, 4121, 11230, 10149, 10723, 5786, 5754, 920, 28755, 10267, 3560, 925, 81790, 919, 80023, 6581, 51293, 64285, 80008, 955, 5243, 3738, 51309, 54900, 917, 29058, 55630, 9037, 29097, 4063, 4064, 2135, 30835	150	1468	5900	1.33969	0.999668	0.999668	20.7315
UP_KEYWORDS	Transmembrane	55	36.1842	0.0179037	10067, 27334, 28978, 3683, 8740, 50615, 28972, 9394, 10162, 6546, 3290, 64748, 10863, 971, 80830, 973, 2327, 79850, 5551, 10666, 4121, 3495, 11230, 10149, 10723, 5786, 5754, 920, 28755, 10267, 3560, 925, 64754, 81790, 90865, 919, 80023, 6581, 51293, 64285, 80008, 955, 5243, 51309, 3738, 54900, 917, 29058, 55630, 9037, 29097, 4063, 4064, 2135, 30835	151	1657	5932	1.30396	0.982834	0.55646	20.6102
UP_SEQ_FEATURE	topological domain:Cytoplasmic	38	25	0.0218353	5754, 920, 28755, 10267, 10067, 3560, 27334, 925, 3683, 8740, 50615, 28972, 919, 51293, 64285, 80008, 9394, 6546, 955, 5243, 3290, 54900, 10863, 971, 917, 973, 10666, 55630, 9037, 4121, 11230, 4063, 10149, 10723, 4064, 5786, 2135, 30835	150	1064	5900	1.40476	0.999982	0.99581	27.2078
UP_KEYWORDS	Membrane	71	46.7105	0.0245163	10067, 9456, 1191, 27334, 28978, 3683, 8740, 50615, 28972, 25827, 9394, 10162, 6546, 3290, 5881, 64748, 10863, 971, 80830, 973, 2327, 79850, 4833, 5551, 10666, 4121, 8631, 1984, 3495, 23413, 11230, 10149, 10723, 5786, 5754, 3801, 920, 28755, 10267, 3560, 2628, 925, 64754, 81790, 90865, 919, 80023, 5138, 6581, 51293, 10018, 1174, 3730, 80008, 64285, 955, 5243, 51309, 3738, 54900, 917, 29058, 55630…	151	2287	5932	1.2196	0.996246	0.60577	27.1749
UP_KEYWORDS	Transmembrane helix	53	34.8684	0.038394	10067, 27334, 28978, 3683, 8740, 50615, 28972, 9394, 10162, 6546, 3290, 64748, 10863, 971, 80830, 973, 79850, 10666, 4121, 3495, 11230, 10149, 10723, 5786, 5754, 920, 28755, 10267, 3560, 925, 64754, 81790, 90865, 919, 80023, 6581, 51293, 64285, 80008, 955, 5243, 51309, 3738, 54900, 917, 29058, 55630, 9037, 29097, 4063, 4064, 2135, 30835	151	1652	5932	1.26035	0.999851	0.715894	39.3569
UP_SEQ_FEATURE	glycosylation site:N-linked (GlcNAc...)	46	30.2632	0.0385159	5754, 920, 28755, 1191, 3560, 27334, 3683, 8740, 50615, 3458, 79600, 51293, 6581, 51279, 3730, 64285, 80008, 9394, 6546, 955, 5243, 3290, 79070, 64748, 3738, 10863, 971, 917, 973, 4982, 5551, 10666, 718, 55630, 9037, 4121, 22915, 3495, 3001, 4063, 10149, 10723, 4064, 5786, 2135, 30835	150	1397	5900	1.29516	1	0.998487	43.1623
UP_SEQ_FEATURE	disulfide bond	33	21.7105	0.0577822	5754, 920, 28755, 10267, 1191, 3560, 27334, 3003, 925, 3683, 8740, 50615, 919, 51293, 51279, 955, 10330, 10863, 971, 917, 973, 4982, 5551, 10666, 718, 9037, 4121, 22915, 3001, 3495, 4063, 2135, 30835	150	964	5900	1.34647	1	0.999377	57.5196
UP_KEYWORDS	Glycoprotein	47	30.9211	0.0827172	5754, 920, 28755, 1191, 3560, 27334, 3683, 8740, 50615, 3458, 79600, 51293, 6581, 51279, 3730, 64285, 80008, 9394, 6546, 955, 5881, 5243, 3290, 79070, 64748, 3738, 10863, 971, 917, 973, 4982, 5551, 10666, 718, 55630, 9037, 4121, 22915, 3495, 3001, 4063, 10149, 10723, 4064, 5786, 2135, 30835	151	1508	5932	1.22439	1	0.856675	66.8134
UP_KEYWORDS	Disulfide bond	36	23.6842	0.0932844	5754, 920, 28755, 10267, 1191, 3560, 27334, 18, 3003, 925, 51499, 3683, 8740, 50615, 919, 51293, 51279, 3730, 955, 10330, 10863, 971, 917, 973, 4982, 5551, 10666, 718, 9037, 4121, 22915, 3001, 3495, 4063, 2135, 30835	151	1115	5932	1.26839	1	0.865076	71.3796
UP_SEQ_FEATURE	topological domain:Extracellular	27	17.7632	0.140045	5754, 920, 10267, 3560, 27334, 925, 3683, 8740, 50615, 919, 51293, 80008, 6546, 10863, 54900, 971, 917, 973, 10666, 55630, 9037, 11230, 4063, 10149, 4064, 5786, 30835	150	830	5900	1.27952	1	0.999996	88.5847
UP_KEYWORDS	Signal	39	25.6579	0.194572	5754, 920, 10267, 1191, 3560, 18, 3003, 925, 10609, 3683, 50615, 3458, 919, 79600, 5138, 4150, 51293, 29937, 51279, 3730, 6546, 10330, 79070, 10863, 917, 973, 4982, 5551, 10666, 718, 55630, 9037, 22915, 3001, 4063, 10149, 4064, 5786, 2135	151	1313	5932	1.16687	1	0.952302	93.6984
UP_SEQ_FEATURE	signal peptide	34	22.3684	0.226623	5754, 920, 10267, 1191, 3560, 3003, 925, 3683, 50615, 3458, 919, 79600, 51293, 29937, 51279, 3730, 6546, 10330, 79070, 10863, 917, 973, 4982, 5551, 10666, 718, 55630, 9037, 22915, 3001, 4063, 10149, 4064, 5786	150	1147	5900	1.16594	1	0.999976	97.5191
Annotation Cluster 7	Enrichment Score: 1.2929916144917402
Category	Term	Count	%	PValue	Genes	List Total	Pop Hits	Pop Total	Fold Enrichment	Bonferroni	Benjamini	FDR
KEGG_PATHWAY	hsa04612:Antigen processing and presentation	4	2.63158	0.0147474	920, 3458, 4261, 925	64	20	2372	7.4125	0.852891	0.616452	15.8679
KEGG_PATHWAY	hsa04660:T cell receptor signaling pathway	5	3.28947	0.0367263	920, 3458, 919, 925, 917	64	48	2372	3.86068	0.991989	0.799905	35.2831
BBID	59.L-type_Ca2+_Tat_immune_cells	3	1.97368	0.0452969	920, 3458, 925	9	7	151	7.19048	0.843421	0.370953	34.5643
BBID	97.Immune_injury_MS-lesions_MS_antigen	3	1.97368	0.0735066	920, 3458, 925	9	9	151	5.59259	0.952827	0.457077	50.2676
GOTERM_BP_DIRECT	GO:0007166~cell surface receptor signaling pathway	6	3.94737	0.190088	920, 3458, 919, 10149, 925, 917	137	122	5431	1.94962	1	0.9999	96.2139
Annotation Cluster 8	Enrichment Score: 1.1721841780979412
Category	Term	Count	%	PValue	Genes	List Total	Pop Hits	Pop Total	Fold Enrichment	Bonferroni	Benjamini	FDR
UP_KEYWORDS	Adaptive immunity	7	4.60526	0.000387194	920, 8631, 4063, 54900, 925, 973, 30835	151	39	5932	7.05111	0.0834471	0.0426323	0.49353
KEGG_PATHWAY	hsa05340:Primary immunodeficiency	4	2.63158	0.00253133	920, 4261, 925, 973	64	11	2372	13.4773	0.278884	0.278884	2.90452
GOTERM_CC_DIRECT	GO:0009897~external side of plasma membrane	8	5.26316	0.0025607	4217, 920, 10666, 3458, 3560, 3495, 925, 973	143	75	5667	4.22713	0.351643	0.194794	3.07658
INTERPRO	IPR013783:Immunoglobulin-like fold	14	9.21053	0.0080758	5754, 50615, 3730, 920, 10666, 28755, 7052, 3560, 79070, 3495, 4063, 925, 917, 973	145	242	5678	2.26537	0.946017	0.767658	10.5387
INTERPRO	IPR007110:Immunoglobulin-like domain	9	5.92105	0.0818299	5754, 920, 10666, 28755, 3495, 4063, 925, 917, 973	145	178	5678	1.97993	1	0.999964	69.0412
KEGG_PATHWAY	hsa04514:Cell adhesion molecules (CAMs)	4	2.63158	0.115368	920, 10666, 925, 3683	64	45	2372	3.29444	1	0.895548	75.963
UP_KEYWORDS	Immunoglobulin domain	8	5.26316	0.14454	5754, 920, 10666, 3495, 4063, 925, 917, 973	151	172	5932	1.8272	1	0.946452	86.3912
GOTERM_CC_DIRECT	GO:0045121~membrane raft	5	3.28947	0.15878	920, 10666, 3738, 54900, 973	143	84	5667	2.35889	1	0.961098	87.8431
SMART	SM00408:IGc2	5	3.28947	0.1831	5754, 920, 10666, 917, 973	87	88	3389	2.2133	1	0.999967	89.4926
INTERPRO	IPR003598:Immunoglobulin subtype 2	5	3.28947	0.183695	5754, 920, 10666, 917, 973	145	88	5678	2.22492	1	1	93.8429
INTERPRO	IPR013151:Immunoglobulin	3	1.97368	0.185	920, 3495, 973	145	31	5678	3.78954	1	1	93.9767
SMART	SM00409:IG	6	3.94737	0.326791	5754, 920, 10666, 4063, 925, 973	87	149	3389	1.56862	1	0.999959	98.7825
INTERPRO	IPR003599:Immunoglobulin subtype	6	3.94737	0.326811	5754, 920, 10666, 4063, 925, 973	145	149	5678	1.57686	1	1	99.5639
UP_SEQ_FEATURE	domain:Ig-like C2-type 1	4	2.63158	0.328872	5754, 920, 10666, 4063	150	80	5900	1.96667	1	0.999998	99.6773
UP_SEQ_FEATURE	domain:Ig-like C2-type 2	4	2.63158	0.328872	5754, 920, 10666, 4063	150	80	5900	1.96667	1	0.999998	99.6773
INTERPRO	IPR013106:Immunoglobulin V-set	3	1.97368	0.557023	920, 10666, 925	145	73	5678	1.60926	1	1	99.9986
Annotation Cluster 9	Enrichment Score: 0.5521667039495936
Category	Term	Count	%	PValue	Genes	List Total	Pop Hits	Pop Total	Fold Enrichment	Bonferroni	Benjamini	FDR
GOTERM_BP_DIRECT	GO:0006508~proteolysis	9	5.92105	0.0573561	64285, 28972, 718, 26233, 25827, 10863, 3003, 10318, 51279	137	167	5431	2.13641	1	0.974964	60.0368
GOTERM_MF_DIRECT	GO:0004252~serine-type endopeptidase activity	5	3.28947	0.131594	64285, 718, 3001, 3003, 51279	136	79	5448	2.53537	1	0.999827	84.9245
INTERPRO	IPR001314:Peptidase S1A, chymotrypsin-type	3	1.97368	0.307442	3001, 3003, 51279	145	44	5678	2.66991	1	1	99.3561
UP_SEQ_FEATURE	domain:Peptidase S1	3	1.97368	0.315068	3001, 3003, 51279	150	45	5900	2.62222	1	0.999998	99.5676
SMART	SM00020:Tryp_SPc	3	1.97368	0.317226	3001, 3003, 51279	87	45	3389	2.59693	1	0.999998	98.5753
INTERPRO	IPR001254:Peptidase S1	3	1.97368	0.326247	3001, 3003, 51279	145	46	5678	2.55382	1	1	99.5588
INTERPRO	IPR009003:Trypsin-like cysteine/serine peptidase domain	3	1.97368	0.344919	3001, 3003, 51279	145	48	5678	2.44741	1	1	99.7001
UP_KEYWORDS	Serine protease	3	1.97368	0.398366	3001, 3003, 51279	151	54	5932	2.18249	1	0.977869	99.8483
UP_SEQ_FEATURE	active site:Charge relay system	3	1.97368	0.524053	3001, 3003, 51279	150	69	5900	1.71014	1	1	99.9977
UP_KEYWORDS	Protease	6	3.94737	0.55215	64285, 28972, 3001, 10863, 3003, 51279	151	195	5932	1.20876	1	0.990288	99.9965
Annotation Cluster 10	Enrichment Score: 0.5331044443497456
Category	Term	Count	%	PValue	Genes	List Total	Pop Hits	Pop Total	Fold Enrichment	Bonferroni	Benjamini	FDR
UP_SEQ_FEATURE	repeat:LRR 3	5	3.28947	0.152384	26233, 25827, 4261, 10489, 4064	150	82	5900	2.39837	1	0.999992	90.7273
UP_KEYWORDS	Leucine-rich repeat	5	3.28947	0.152888	26233, 25827, 4261, 10489, 4064	151	82	5932	2.39541	1	0.930513	87.9937
UP_SEQ_FEATURE	repeat:LRR 1	5	3.28947	0.166885	26233, 25827, 4261, 10489, 4064	150	85	5900	2.31373	1	0.999957	92.7655
UP_SEQ_FEATURE	repeat:LRR 2	5	3.28947	0.166885	26233, 25827, 4261, 10489, 4064	150	85	5900	2.31373	1	0.999957	92.7655
GOTERM_BP_DIRECT	GO:0016567~protein ubiquitination	6	3.94737	0.168866	26233, 25827, 10489, 23220, 81790, 140462	137	117	5431	2.03294	1	0.999874	94.3425
INTERPRO	IPR001611:Leucine-rich repeat	4	2.63158	0.254672	26233, 25827, 4261, 4064	145	69	5678	2.27006	1	1	98.2347
UP_SEQ_FEATURE	repeat:LRR 4	4	2.63158	0.266405	25827, 4261, 10489, 4064	150	71	5900	2.21596	1	0.999993	98.8393
UP_SEQ_FEATURE	repeat:LRR 7	3	1.97368	0.424333	25827, 10489, 4064	150	57	5900	2.07018	1	1	99.9645
UP_SEQ_FEATURE	repeat:LRR 6	3	1.97368	0.483889	25827, 10489, 4064	150	64	5900	1.84375	1	1	99.9926
UP_SEQ_FEATURE	repeat:LRR 5	3	1.97368	0.516188	25827, 10489, 4064	150	68	5900	1.73529	1	1	99.9971
UP_KEYWORDS	Ubl conjugation pathway	6	3.94737	0.635504	26233, 25827, 10489, 23220, 81790, 140462	151	214	5932	1.10144	1	0.992025	99.9997
GOTERM_MF_DIRECT	GO:0004842~ubiquitin-protein transferase activity	3	1.97368	0.800121	26233, 25827, 23220	136	119	5448	1.00989	1	1	100
Annotation Cluster 11	Enrichment Score: 0.4091822261702191
Category	Term	Count	%	PValue	Genes	List Total	Pop Hits	Pop Total	Fold Enrichment	Bonferroni	Benjamini	FDR
SMART	SM00326:SH3	4	2.63158	0.331563	10458, 8631, 53347, 9873	87	80	3389	1.9477	1	0.99973	98.8753
UP_KEYWORDS	SH3 domain	4	2.63158	0.357471	10458, 8631, 53347, 9873	151	84	5932	1.8707	1	0.978246	99.6486
INTERPRO	IPR001452:Src homology-3 domain	4	2.63158	0.366174	10458, 8631, 53347, 9873	145	85	5678	1.84276	1	1	99.8093
UP_SEQ_FEATURE	domain:SH3	3	1.97368	0.531833	10458, 8631, 53347	150	70	5900	1.68571	1	1	99.9982
Annotation Cluster 12	Enrichment Score: 0.26025020233841173
Category	Term	Count	%	PValue	Genes	List Total	Pop Hits	Pop Total	Fold Enrichment	Bonferroni	Benjamini	FDR
INTERPRO	IPR013083:Zinc finger, RING/FYVE/PHD-type	5	3.28947	0.471589	7703, 2245, 23220, 10765, 81790	145	139	5678	1.40858	1	1	99.9843
SMART	SM00184:RING	3	1.97368	0.543215	7703, 23220, 81790	87	71	3389	1.64594	1	0.999998	99.9838
INTERPRO	IPR001841:Zinc finger, RING-type	3	1.97368	0.646717	7703, 23220, 81790	145	86	5678	1.366	1	1	99.9999
Annotation Cluster 13	Enrichment Score: 0.25793501077592546
Category	Term	Count	%	PValue	Genes	List Total	Pop Hits	Pop Total	Fold Enrichment	Bonferroni	Benjamini	FDR
INTERPRO	IPR018247:EF-Hand 1, calcium-binding site	3	1.97368	0.435227	63941, 5523, 23413	145	58	5678	2.02545	1	1	99.9609
INTERPRO	IPR002048:EF-hand domain	3	1.97368	0.541883	63941, 5523, 23413	145	71	5678	1.65459	1	1	99.9978
GOTERM_MF_DIRECT	GO:0005509~calcium ion binding	7	4.60526	0.603575	63941, 5551, 5523, 6546, 22915, 4121, 23413	136	253	5448	1.10835	1	1	99.9996
INTERPRO	IPR011992:EF-hand-like domain	3	1.97368	0.652991	63941, 5523, 23413	145	87	5678	1.3503	1	1	100
Annotation Cluster 14	Enrichment Score: 0.2433678739269488
Category	Term	Count	%	PValue	Genes	List Total	Pop Hits	Pop Total	Fold Enrichment	Bonferroni	Benjamini	FDR
GOTERM_MF_DIRECT	GO:0005525~GTP binding	5	3.28947	0.431479	7052, 4261, 55303, 5881, 64792	136	135	5448	1.48366	1	1	99.9486
INTERPRO	IPR027417:P-loop containing nucleoside triphosphate hydrolase	9	5.92105	0.543749	3801, 9394, 90634, 4261, 55303, 5881, 5243, 64792, 4629	145	313	5678	1.12597	1	1	99.9979
UP_KEYWORDS	GTP-binding	4	2.63158	0.601026	4261, 55303, 5881, 64792	151	122	5932	1.28803	1	0.991836	99.9992
UP_SEQ_FEATURE	nucleotide phosphate-binding region:GTP	3	1.97368	0.753836	55303, 5881, 64792	150	106	5900	1.11321	1	1	100
Annotation Cluster 15	Enrichment Score: 0.2156126109386913
Category	Term	Count	%	PValue	Genes	List Total	Pop Hits	Pop Total	Fold Enrichment	Bonferroni	Benjamini	FDR
KEGG_PATHWAY	hsa04810:Regulation of actin cytoskeleton	5	3.28947	0.255479	10552, 10458, 5881, 2245, 3683	64	97	2372	1.91044	1	0.946467	96.7641
GOTERM_BP_DIRECT	GO:0030036~actin cytoskeleton organization	3	1.97368	0.479512	10552, 5881, 2245	137	64	5431	1.85823	1	1	99.9961
UP_KEYWORDS	Cell projection	6	3.94737	0.841897	10458, 5881, 2245, 23552, 64792, 79600	151	279	5932	0.844834	1	0.997764	100
GOTERM_CC_DIRECT	GO:0005856~cytoskeleton	3	1.97368	0.886294	10458, 2245, 79600	143	146	5667	0.814302	1	0.999963	100
UP_KEYWORDS	Cytoskeleton	8	5.26316	0.913999	3801, 10552, 23271, 10458, 5881, 2245, 79600, 5239	151	419	5932	0.750067	1	0.999156	100
Annotation Cluster 16	Enrichment Score: 0.18210289600684948
Category	Term	Count	%	PValue	Genes	List Total	Pop Hits	Pop Total	Fold Enrichment	Bonferroni	Benjamini	FDR
UP_KEYWORDS	Biological rhythms	3	1.97368	0.324971	406, 1408, 10765	151	46	5932	2.56205	1	0.982035	99.34
GOTERM_BP_DIRECT	GO:0045892~negative regulation of transcription, DNA-templated	4	2.63158	0.904711	4261, 406, 1408, 10765	137	211	5431	0.751513	1	1	100
UP_KEYWORDS	Isopeptide bond	7	4.60526	0.966801	10067, 92815, 406, 1408, 10765, 4000, 10763	151	431	5932	0.638036	1	0.999912	100
Annotation Cluster 17	Enrichment Score: 0.1768508977524072
Category	Term	Count	%	PValue	Genes	List Total	Pop Hits	Pop Total	Fold Enrichment	Bonferroni	Benjamini	FDR
UP_KEYWORDS	Mitochondrion	9	5.92105	0.5026	4833, 1191, 2628, 18, 25821, 5138, 51499, 10018, 140462	151	303	5932	1.16687	1	0.988773	99.9867
UP_SEQ_FEATURE	transit peptide:Mitochondrion	4	2.63158	0.600164	4833, 2628, 18, 25821	150	122	5900	1.28962	1	1	99.9998
GOTERM_CC_DIRECT	GO:0005739~mitochondrion	11	7.23684	0.608697	4833, 7052, 6546, 1191, 1408, 2628, 18, 25821, 51499, 10018, 140462	143	418	5667	1.04288	1	0.99964	99.9989
UP_KEYWORDS	Transit peptide	4	2.63158	0.74149	4833, 2628, 18, 25821	151	151	5932	1.04066	1	0.994742	100
KEGG_PATHWAY	hsa01100:Metabolic pathways	7	4.60526	0.95884	4833, 51477, 3290, 4121, 2628, 18, 2135	64	387	2372	0.670381	1	1	100
Annotation Cluster 18	Enrichment Score: 0.11955088743845362
Category	Term	Count	%	PValue	Genes	List Total	Pop Hits	Pop Total	Fold Enrichment	Bonferroni	Benjamini	FDR
UP_KEYWORDS	Metal-binding	30	19.7368	0.690225	63941, 7703, 5916, 18, 3683, 64754, 81790, 9830, 2245, 10467, 5138, 4150, 22806, 29937, 4217, 6546, 2063, 1465, 10863, 51621, 4833, 5551, 5523, 7052, 23413, 5239, 23220, 10765, 2135, 30835	151	1226	5932	0.961291	1	0.992425	100
UP_KEYWORDS	Zinc-finger	13	8.55263	0.714756	9830, 51621, 7703, 2063, 2245, 5916, 10467, 4150, 23220, 22806, 10765, 64754, 81790	151	536	5932	0.952802	1	0.993527	100
GOTERM_MF_DIRECT	GO:0008270~zinc ion binding	9	5.92105	0.77585	9830, 920, 7703, 2063, 1465, 5916, 23220, 10765, 81790	136	396	5448	0.910428	1	1	100
UP_KEYWORDS	Zinc	16	10.5263	0.8687	7703, 2063, 1465, 5916, 10863, 64754, 81790, 51621, 9830, 55630, 2245, 10467, 4150, 23220, 22806, 10765	151	750	5932	0.838075	1	0.998394	100
Annotation Cluster 19	Enrichment Score: 0.07636994473680928
Category	Term	Count	%	PValue	Genes	List Total	Pop Hits	Pop Total	Fold Enrichment	Bonferroni	Benjamini	FDR
GOTERM_MF_DIRECT	GO:0003677~DNA binding	14	9.21053	0.68514	7703, 4213, 2063, 5916, 4291, 1408, 81030, 6666, 9760, 92815, 4261, 406, 5450, 10765	136	577	5448	0.971965	1	1	100
GOTERM_BP_DIRECT	GO:0006351~transcription, DNA-templated	13	8.55263	0.878601	7703, 7832, 2063, 5916, 4291, 1408, 8031, 90865, 4261, 406, 51186, 10765, 6604	137	629	5431	0.819317	1	1	100
UP_KEYWORDS	Transcription	17	11.1842	0.898608	7703, 7832, 2063, 8031, 5916, 1408, 6666, 51621, 90865, 4261, 406, 51186, 4150, 5450, 22806, 10765, 6604	151	820	5932	0.81444	1	0.999136	100
UP_KEYWORDS	Transcription regulation	16	10.5263	0.914911	7703, 7832, 2063, 8031, 5916, 1408, 6666, 51621, 4261, 406, 51186, 4150, 5450, 22806, 10765, 6604	151	792	5932	0.793632	1	0.999104	100
Annotation Cluster 20	Enrichment Score: 0.0556288218354976
Category	Term	Count	%	PValue	Genes	List Total	Pop Hits	Pop Total	Fold Enrichment	Bonferroni	Benjamini	FDR
UP_KEYWORDS	Cell junction	6	3.94737	0.837351	3801, 5754, 29058, 9456, 23413, 5239	151	277	5932	0.850934	1	0.997755	100
UP_KEYWORDS	Synapse	3	1.97368	0.872077	29058, 9456, 23413	151	139	5932	0.847873	1	0.998381	100
GOTERM_CC_DIRECT	GO:0030054~cell junction	3	1.97368	0.932505	29058, 9456, 23413	143	171	5667	0.695252	1	0.999994	100
Annotation Cluster 21	Enrichment Score: 0.037833741901098665
Category	Term	Count	%	PValue	Genes	List Total	Pop Hits	Pop Total	Fold Enrichment	Bonferroni	Benjamini	FDR
UP_KEYWORDS	Nucleotide-binding	14	9.21053	0.82034	4217, 3801, 5243, 55303, 5881, 1408, 23552, 4833, 4261, 4629, 64792, 5138, 51422, 9465	151	630	5932	0.872995	1	0.997374	100
UP_KEYWORDS	Kinase	6	3.94737	0.844132	4217, 4833, 4261, 23552, 51422, 9465	151	280	5932	0.841816	1	0.997668	100
GOTERM_MF_DIRECT	GO:0005524~ATP binding	10	6.57895	0.917784	4217, 4833, 3801, 5754, 7052, 4261, 5243, 23552, 4629, 51422	136	528	5448	0.75869	1	1	100
UP_KEYWORDS	ATP-binding	8	5.26316	0.971571	4217, 4833, 3801, 4261, 5243, 23552, 4629, 51422	151	493	5932	0.637481	1	0.999928	100
UP_SEQ_FEATURE	binding site:ATP	3	1.97368	0.974415	4217, 4833, 23552	150	214	5900	0.551402	1	1	100
UP_SEQ_FEATURE	nucleotide phosphate-binding region:ATP	5	3.28947	0.985449	4217, 3801, 4261, 23552, 4629	150	366	5900	0.537341	1	1	100
Annotation Cluster 22	Enrichment Score: 0.033533263972680964
Category	Term	Count	%	PValue	Genes	List Total	Pop Hits	Pop Total	Fold Enrichment	Bonferroni	Benjamini	FDR
GOTERM_BP_DIRECT	GO:0006468~protein phosphorylation	4	2.63158	0.861483	4217, 5754, 23552, 51422	137	190	5431	0.834575	1	1	100
GOTERM_MF_DIRECT	GO:0004672~protein kinase activity	3	1.97368	0.908101	4217, 5754, 23552	136	158	5448	0.760611	1	1	100
INTERPRO	IPR000719:Protein kinase, catalytic domain	3	1.97368	0.965013	4217, 5754, 23552	145	199	5678	0.590331	1	1	100
INTERPRO	IPR011009:Protein kinase-like domain	3	1.97368	0.972641	4217, 5754, 23552	145	210	5678	0.559409	1	1	100
Annotation Cluster 23	Enrichment Score: 0.02136592163304212
Category	Term	Count	%	PValue	Genes	List Total	Pop Hits	Pop Total	Fold Enrichment	Bonferroni	Benjamini	FDR
UP_SEQ_FEATURE	zinc finger region:C2H2-type 1	3	1.97368	0.922085	51621, 4150, 22806	150	163	5900	0.723926	1	1	100
UP_SEQ_FEATURE	zinc finger region:C2H2-type 2	3	1.97368	0.935681	51621, 4150, 22806	150	172	5900	0.686047	1	1	100
GOTERM_MF_DIRECT	GO:0003676~nucleic acid binding	5	3.28947	0.94036	51621, 10248, 79035, 4150, 22806	136	295	5448	0.678963	1	1	100
UP_SEQ_FEATURE	zinc finger region:C2H2-type 3	3	1.97368	0.94347	51621, 4150, 22806	150	178	5900	0.662921	1	1	100
INTERPRO	IPR013087:Zinc finger C2H2-type/integrase DNA-binding domain	3	1.97368	0.957301	51621, 4150, 22806	145	190	5678	0.618294	1	1	100
INTERPRO	IPR015880:Zinc finger, C2H2-like	3	1.97368	0.970735	51621, 4150, 22806	145	207	5678	0.567516	1	1	100
SMART	SM00355:ZnF_C2H2	3	1.97368	0.972188	51621, 4150, 22806	87	207	3389	0.564551	1	1	100
INTERPRO	IPR007087:Zinc finger, C2H2	3	1.97368	0.975556	51621, 4150, 22806	145	215	5678	0.546399	1	1	100
